# Supplementary material for: Comparing the efficacy of various methods for sulfate radical generation for antibiotics degradation in synthetic wastewater: degradation mechanism, kinetics study, and toxicity assessment
Source: Royal Society of Chemistry journal article supplement (doi:10.1039/d2ra01618d), 2022-01-01
Supplement: d2ra01618d1.pdf [file d2ra01618d1.pdf]

**Comparing the efficacy of various methods for sulfate radical generation for antibiotics degradation in synthetic wastewater: Degradation mechanism, kinetics study, and toxicity assessment**

Ali Behnami<sup>1,2</sup>, Ehsan Aghayani<sup>3</sup>, Khaled Zoroufchi Benis<sup>4</sup>, Mohammad Sattarei<sup>5</sup>, Mojtaba Pourakbar<sup>1\*</sup>

*1. Department of Environmental Health Engineering, Maragheh University of Medical Sciences, Maragheh, Iran.*

*2. Department of Environmental Health Engineering, Iran University of Medical Sciences, Tehran, Iran.*

*3. Research Center for Environmental Contaminants (RCEC), Abadan University of Medical Sciences, Abadan, Iran.*

*4. Department of Chemical and Biological Engineering, University of Saskatchewan, Saskatoon, Saskatchewan, Canada.*

*5. Department of Biophysics, Faculty of Biological Sciences, Malayer University, Malayer, Iran.*

*\*Correspondence to: Mojtaba Pourakbar, Email: [ppourakbar@yahoo.com](mailto:ppourakbar@yahoo.com), Tel (+98)*

*04132726363*

**Table 1S.** Identification of degradation intermediates of AMX by LC-MS (positive ion mode ESI mass spectra).

| Intermediates | Degradation Time (min) | m/z   | Corresponding intermediates of Dexamethasone |
|---------------|------------------------|-------|----------------------------------------------|
| AMX           | 5                      | 365.4 |                                              |
| A1            | 5                      | 364   |                                              |
| A2            | 5                      | 388.2 |                                              |
| A3            | 5                      | 384.2 |                                              |
| A4            | 5                      | 349.3 |                                              |
| A5            | 5                      | 340.3 |                                              |

|       |    |       |                                                                                      |
|-------|----|-------|--------------------------------------------------------------------------------------|
| A6    | 5  | 307   | 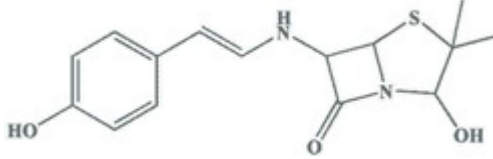   |
| A7    | 10 | 285   |    |
| A8    | 10 | 263   |   |
| A9    | 5  | 259.1 |  |
| A10   | 20 | 189.3 |  |
| A11-1 | 5  | 165.2 |  |

|       |    |       |                                                                                      |
|-------|----|-------|--------------------------------------------------------------------------------------|
| A11-2 | 5  | 166   | 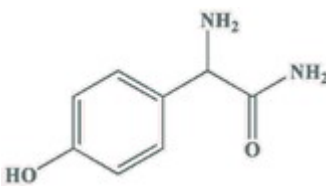   |
| A11-3 | 5  | 166   |    |
| A12   | 10 | 143.2 |    |
| A12-2 | 10 | 144   |   |
| A13   | 20 | 139.3 |  |
| A13-2 | 20 | 138   |  |

---

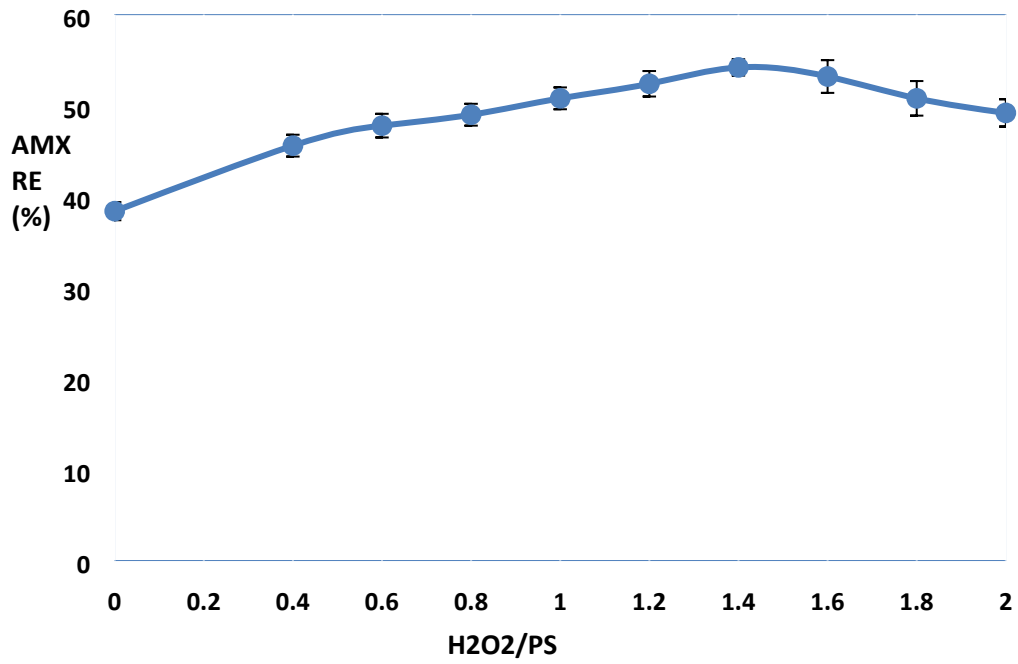

**Fig. 1S:** The effect of H<sub>2</sub>O<sub>2</sub>/PS ratio on AMX degradation  
(pH=7, AMX= 50 mg/L, time= 30 min)

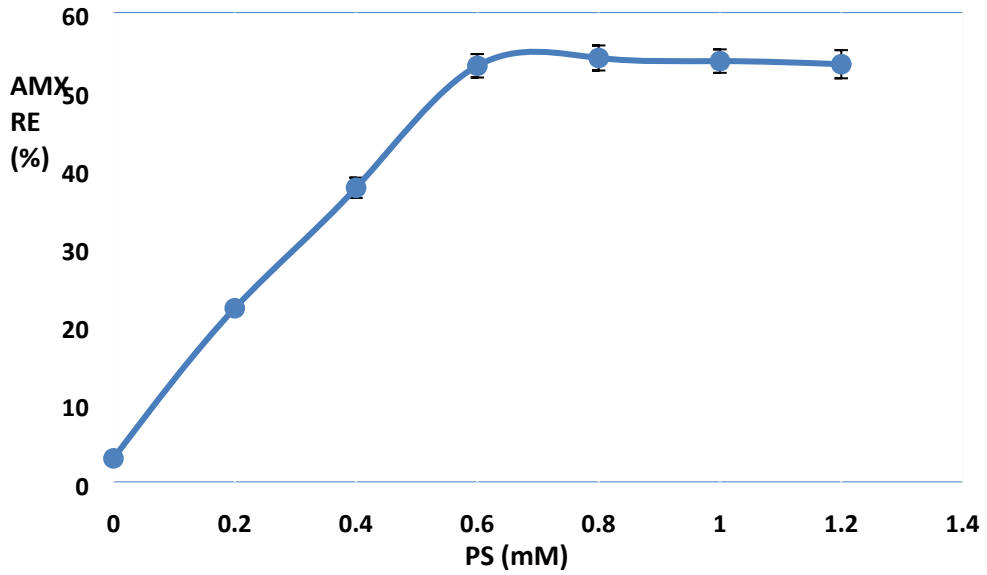

**Fig 2S:** The effect of persulfate concentration in UV/PS process  
(pH=3, AMX= 50 mg/L, time= 15 min)

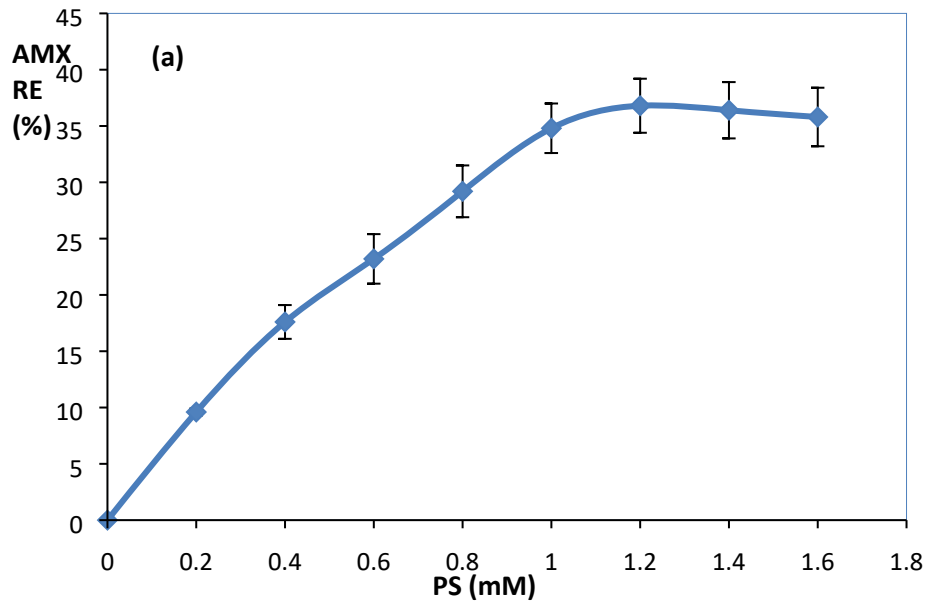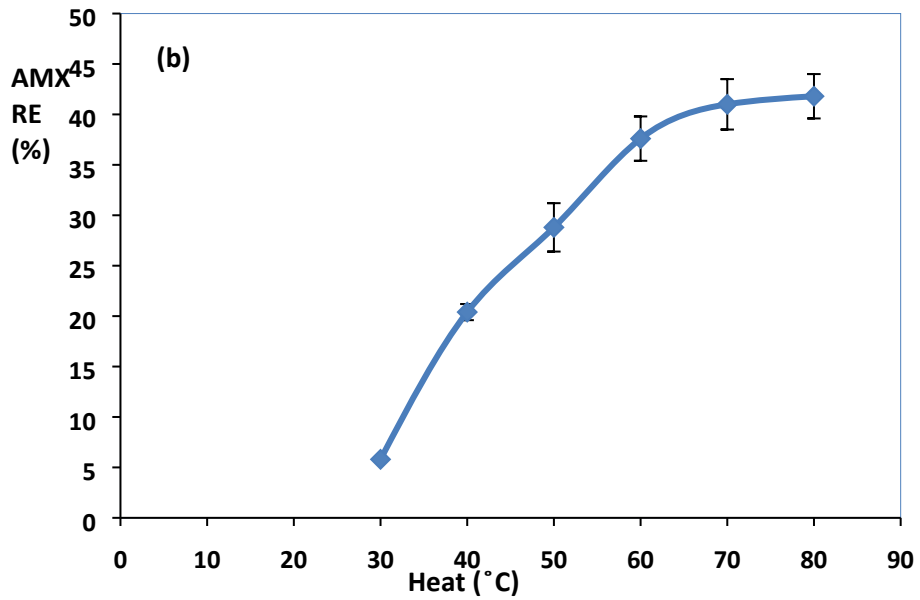

**Fig. 3S:** The effect of PS (a) and heat (b) on PS activation  
(pH=5, AMX= 50 mg/L, time= 30 min)

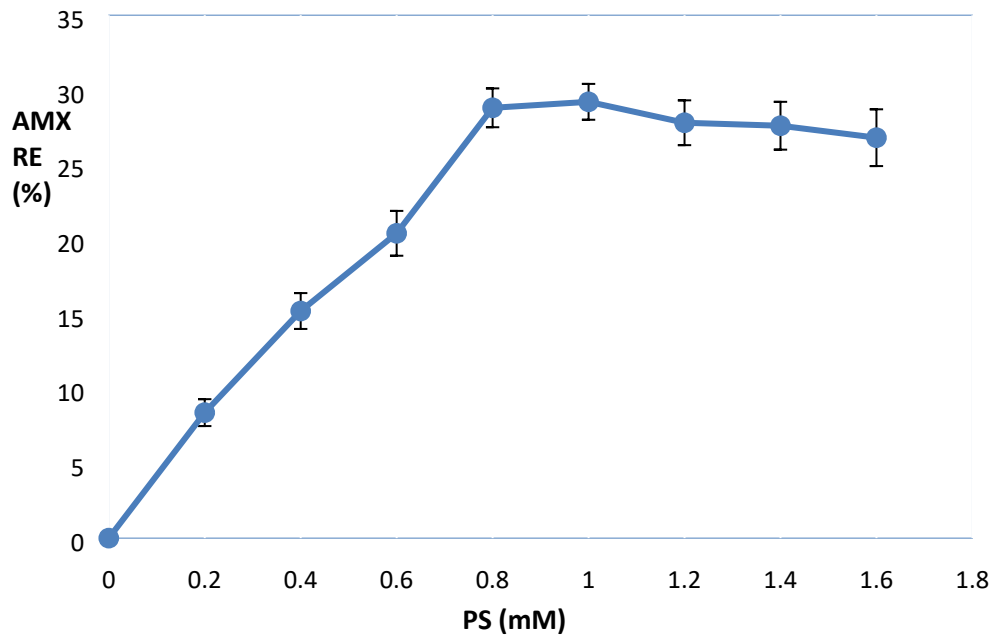

**Fig. 4S:** The effect of PS concentration on the US/PS process  
(pH=5, AMX= 50 mg/L, time= 30 min, US= 30kHz)
